# Supplementary material for: Comprehensive metabolomics-based analysis of sugar composition and content in berries of 18 grape varieties
Source: Front Plant Sci. 2023 Jun 9;14:1200071. doi: 10.3389/fpls.2023.1200071 (PMC10288860; doi:10.3389/fpls.2023.1200071)
Supplement: Supplementary file 2 [file Table_2.xlsx]

## Sheet: Sheet1
	Table: S3 Mean sugar content in grape varieties
English name	Abbr.	D-Arabinose	D-Fructose	L-Fucose	Glucose	Inositol	Lactose	Maltose	L-Rhamnose	D-Sorbitol	Sucrose	Trehalose	Xylitol
Melissa Grape	ML	0.00846667	244.667	0.0154667	254.667	1.76	0.0164667	0	0.0353667	0.0112333	62	0.00907667	0.00675667
Huozhouhongyu	HZHY	0.00864	244.667	0.0182667	233.333	1.4	0.0227333	0	0.0340667	0.0216	64.6333	0.0116667	0.00737333
Huozhouheiyu	HZ	0.00856	214.667	0.0187	205.667	1.50333	0.0361333	0.0766	0.0401	0.0265667	54.1667	0.0119	0.00727
Yatomi Rosa	FHYDM	0.00875	265	0.0142	242.333	0.772	0.0199	0.106867	0.0422667	0.0274667	52.7	0.0109	0.00656333
Munake	MN	0.0132333	205.667	0.0259	203.333	0.615333	0.0186	0.177467	0.0418	0.0143	43.6667	0.0154	0.00712667
Centennial seedless	CT	0.0156667	204.333	0.0203667	182	0.311333	0.0613667	0	0.0503667	0.130667	35.1	0.0281333	0.00723333
Thompson seedless	TS	0.00977667	231	0.0206333	218.667	0.399667	0.0333	0	0.0388	0.0251	64.7333	0.0198	0.00692667
Red Globe	RG	0.0125333	242	0.0186667	203	0.517667	0.0287333	0	0.0402667	0.0455333	29.3	0.0259333	0.00674
Black Monukka	MK	0.00778333	211.333	0.0196333	211.333	1.64333	0.0244667	0	0.0389333	0.00895667	54.8667	0.0100067	0.00718667
Victoria	VT	0.01096	185.667	0.0228333	193.667	1.48333	0.0165967	0	0.0495333	0.0203667	32.9	0.0122	0.00747
Shine-Muscat	SM	0.00927667	216.333	0.0331667	211	1.18333	0.0122	0	0.0465667	0.0130667	46.2333	0.0132	0.00747667
Wuhecuibao	WHCB	0.00968	242.667	0.0286333	222.333	0.583333	0.0231667	0	0.046	0.0258	61.9333	0.0137333	0.00768333
XinYu	XY	0.00926	224.333	0.0278333	221.667	1.01767	0.0218667	0.0788333	0.0501	0.0151	48.1333	0.0147333	0.00794667
Rizamat	RZ	0.00878333	193	0.023	200.667	0.933333	0.0365	0	0.0565667	0.0135667	57.4	0.0161	0.00804667
Flame Seedless	FS	0.00932333	240	0.0204333	235.333	0.927333	0.0516	0	0.0581	0.0381333	61.9667	0.0190667	0.00720333
Crimson seedless	CS	0.00963	217.667	0.0360667	217.667	0.482667	0.0295667	0	0.0534667	0.0171	55.9333	0.0108333	0.00828333
Bronx Seedless	BS	0.0185333	204.667	0.0313333	203	2.04333	0.0340667	0.0906333	0.0610333	0.0239667	51.0667	0.0160333	0.00841667
Summer Black	SB	0.0084	205.333	0.0173	207.667	0.597	0.0615	0	0.0597333	0.0217667	55.2333	0.0156667	0.00787333
